# Supplementary material for: Lifestyle interventions addressing cardiometabolic health among Black American women of reproductive age in the U.S. : an integrative review
Source: Springer Nature journal article supplement (doi:10.1186/s12884-025-07490-7), 2025-05-19
Supplement: MOESM2 [file 12884_2025_7490_MOESM2_ESM.pdf]

## Supplementary Materials

**Table 2. Characteristics of Studies**

| Authors                    | Study Design                                                                  | Location                                                                     | Participants                                                                                                                                                  | Stage      | Sample Size | % of Black/<br>African<br>American<br>Participants | Intervention and<br>Delivery Approach                                                                                                                                                                                                                                                                          | Dose of<br>Intervention                                                          |
|----------------------------|-------------------------------------------------------------------------------|------------------------------------------------------------------------------|---------------------------------------------------------------------------------------------------------------------------------------------------------------|------------|-------------|----------------------------------------------------|----------------------------------------------------------------------------------------------------------------------------------------------------------------------------------------------------------------------------------------------------------------------------------------------------------------|----------------------------------------------------------------------------------|
| Thompson et al., 2016 [48] | RCT<br>I: PATE (Lifestyle-enhanced PAT home visits)<br>C: PAT (Usual Control) | Washington, Bolivar, or Humphreys County in Mississippi                      | N=82 (PATE: 39 vs. PAT: 43), predominantly low-income pregnant women who were overweight and obese; mean age $22.7 \pm 4.69$ (PATE) vs. $23.3 \pm 4.58$ (PAT) | Pregnancy  | 82          | 95%                                                | <b>PATE intervention (PATE):</b> healthy eating, physical activity (e.g., goal setting, instructional DVDs); <b>Delivered</b> by trained parent educators.                                                                                                                                                     | 90 to 120 min (PATE)/month x 6 months                                            |
| Thomson et al. 2018 [50]   | RCT<br>I: PATE (Lifestyle-enhanced PAT home visits)<br>C: PAT (Usual Control) | Washington, Bolivar, or Humphreys County in Mississippi                      | N=54 (I: 24 vs. C: 30) postpartum women from rural areas, PATE mean postpartum BMI for control: 30.4, for intervention group: 31.6                            | Postpartum | 54          | 95%                                                | <b>PATE intervention (PATE):</b> culturally tailored maternal weight management (e.g., set exercise goals, instructional DVDs), early childhood obesity prevention, home visits, optional monthly group meetings, developmental screening, and resource network; <b>Delivered</b> by trained parent educators. | Up to 12 home visits for 18 months (6 months pregnancy and 12 months postpartum) |
| Berry et al., 2015 [23]    | RCT<br>I: Weight management intervention<br>C: Control group                  | WakeMed Health & Hospitals and UNC REX Healthcare in Raleigh, North Carolina | N=60 (I=30 vs. C:30) postpartum women ( $\geq 6$ weeks postpartum); mean age: $27.2 \pm 6.4$                                                                  | Postpartum | 60          | 77%                                                | <b>Weight Management:</b> group class education on nutrition, exercise (a pedometer), and coping skills for metabolic control and nutrition; <b>Delivered</b> by health educators.                                                                                                                             | 60-minute/class x 12 classes and 3 monthly follow-ups                            |

|                          |                                                                                                             |                                                                                                                          |                                                                                                                                                                                            |                          |     |      |                                                                                                                                                                                                                                                            |                                                                                                   |
|--------------------------|-------------------------------------------------------------------------------------------------------------|--------------------------------------------------------------------------------------------------------------------------|--------------------------------------------------------------------------------------------------------------------------------------------------------------------------------------------|--------------------------|-----|------|------------------------------------------------------------------------------------------------------------------------------------------------------------------------------------------------------------------------------------------------------------|---------------------------------------------------------------------------------------------------|
| Boyd et al 2019 [25]     | RCT<br>I: Parents Interacting with Infants (PIWI) delivered via social media<br>C: PIWI delivered in-person | Urban pediatric primary care clinics within a larger pediatric care network, the Children's Hospital of Philadelphia, PA | N=24 (I:12 vs. C: 12) postpartum women with postpartum depression from unspecified pediatric clinic; Intervention mean age: $26.4 \pm 1.9$ vs. Control mean age: $26.3 \pm 1.8$            | Postpartum               | 24  | 84%  | <b>Postpartum Depression and Parenting (PIWI):</b> parenting program including 8 topics (depression education, infant temperament, play, feeding, safety, sleep, parent-child interactions, and reading; <b>Delivered</b> by facilitator via social media. | 1-2 hrs/wk x 8 weeks                                                                              |
| Crockett et al 2008 [28] | RCT<br>I: ROSE intervention<br>C: Treatment as usual                                                        | Hospital-affiliated prenatal clinic in the Mississippi Delta                                                             | N=36 (I: 19 vs.C:17) low-income pregnant women; mean age: $23.4 \pm 4.98$                                                                                                                  | Pregnancy and postpartum | 36  | 100% | <b>Depression Prevention (ROSE):</b> involving individual and group sessions on coping and depression prevention; <b>Delivered</b> by therapist.                                                                                                           | Pregnancy: 90 min/week x 4 weeks<br>Postpartum: 50 min/week x 2 weeks                             |
| Berry et al., 2016 [24]  | RCT cluster<br>I: Group Perinatal Health Classes<br>C: Wait-List                                            | WakeMed Health & Hospitals and UNC REX Healthcare in Raleigh, North Carolina                                             | N= 100 (I:50 vs. C=50); pregnant women (22-36wks) with a diagnosis of GDM; mean age: $30.16 \pm 6.26$                                                                                      | Pregnancy and postpartum | 100 | 52%  | <b>Group Perinatal Health Class:</b> education on the benefits of breastfeeding for metabolic control, nutrition, and exercise; <b>Delivered</b> by interventionists and received monthly motivational text messages                                       | 60minutes/class x 14 weekly classes from pregnancy to postpartum and 3 monthly postpartum classes |
| Joshi et al. 2018 [31]   | RCT:<br>I: Revolutionizing Exercise and Nutrition Everyday in Women (RENEW)<br>C: Usual care                | Boston Medical Center                                                                                                    | N=62 (I: 32 vs. C:32) postpartum women; Intervention mean age: $30.2 \pm 6.1$ vs. Control mean age: $31.2 \pm 6.3$ ; Intervention mean BMI: $35.6 \pm 7.7$ vs. Control BMI: $34.4 \pm 5.3$ | Postpartum               | 62  | 100% | <b>Weight Management (RENEW):</b> in-person weight loss involving nutrition education and physical activity (resistance exercise and dancing); <b>Delivered</b> by the dietitian and peer health worker.                                                   | ~35 min or more/week x 8 weeks                                                                    |

|                         |                                                                                                         |                |                                                                                                                                                             |                          |     |      |                                                                                                                                                                                                                                                                                                  |                                                                                                                                                                                                                                                     |
|-------------------------|---------------------------------------------------------------------------------------------------------|----------------|-------------------------------------------------------------------------------------------------------------------------------------------------------------|--------------------------|-----|------|--------------------------------------------------------------------------------------------------------------------------------------------------------------------------------------------------------------------------------------------------------------------------------------------------|-----------------------------------------------------------------------------------------------------------------------------------------------------------------------------------------------------------------------------------------------------|
| Liu et al 2015 [54]     | RCT Pilot<br>I: Lifestyle intervention<br>C: Control with medical data retrieved from the medical chart | South Carolina | N=16 (I: 16 vs. C: 38), overweight or obese African American women at 13.2±2.5 weeks of gestation; mean age 25.1 ± 4.2 years                                | Pregnancy and postpartum | 16  | 100% | <b>Lifestyle intervention:</b> self-monitoring of physical activity (pedometer), diet, and weight (scale)self, how to self-regulate (e.g., set goals, problem solve) and cope in high-risk situations; <b>Delivered</b> by a registered dietitian and an African American research staff member. | Pregnancy: 1 individual counseling session followed by 8 group sessions alternated with telephone counseling contacts.<br><br>Postpartum: received a home visit and up to three counseling calls to promote postpartum weight loss through week 12. |
| Walker et al. 2012 [51] | RCT<br>I: Weight retention<br>C: Wait-list                                                              | Texas          | N= 71 (I: 34 vs. C: 37) overweight postpartum low-income women; mean age: 24.6 ± 4.8; mean BMI: 33.5 ± 6.4                                                  | Postpartum               | 71  | 35%  | <b>Ethnic tailored Weight Management:</b> increase self-efficacy related to eating patterns, weight (digital scale), physical activity (pedometers), stress, and psychosocial well-being; <b>Delivered</b> by RNs and health educators.                                                          | 2 hrs/wk x 13 weeks.                                                                                                                                                                                                                                |
| Liu et al 2022 [42]     | RCT<br>I: Behavioral lifestyle intervention<br>C: Standard care                                         | South Carolina | N=228 (I: 114 vs. C: 114) pregnant women (≤16 wks) overweight and obesity; pre-pregnancy BMI: 32.3 ± 5.9 .6% had obesity pre-pregnancy); mean age: 29.7±5.0 | Pregnancy and postpartum | 228 | 44%  | <b>Postpartum Weight management:</b> feedback on diet and physical activity (pedometer), personalized weight gain (scale) tracking graphs, brief telephone counseling, behavioral podcast, social media                                                                                          | Pregnancy: 1 in-depth counseling before or at 18 gestational weeks; 10 weekly brief telephone counseling and                                                                                                                                        |

|                         |                                                                                                                          |                                                                                                                                                            |                                                                                                                                                          |            |     |     |                                                                                                                                                                                                                                                                                                                                  |                                                                                                                       |
|-------------------------|--------------------------------------------------------------------------------------------------------------------------|------------------------------------------------------------------------------------------------------------------------------------------------------------|----------------------------------------------------------------------------------------------------------------------------------------------------------|------------|-----|-----|----------------------------------------------------------------------------------------------------------------------------------------------------------------------------------------------------------------------------------------------------------------------------------------------------------------------------------|-----------------------------------------------------------------------------------------------------------------------|
|                         |                                                                                                                          |                                                                                                                                                            |                                                                                                                                                          |            |     |     | support, and weight monitoring; <b>Delivered</b> by interventionists.                                                                                                                                                                                                                                                            | accompanying podcasts.<br><br>Postpartum: 1 in-depth counseling at 6-8 weeks; biweekly counseling calls for 6 months. |
| Wilcox et al. 2022 [49] | RCT<br>I: Lifestyle intervention<br>C: Standard care                                                                     | South Carolina                                                                                                                                             | N=219 (I=112 vs. C: 107) pregnant women , overweight and obesity mean age: I 30.4 ±5.2 vs. C: 29.1 ± 4.8; Pre pregnancy BMI: I 33 ± 6.6 vs. C 33.9 ± 6.1 | Pregnancy  | 219 | 44% | <b>Behavioral Intervention:</b> diet and physical activity self-monitoring (Sense Wear Armband) and counseling calls with behavioral podcasts and use of a private Facebook group; <b>Social support:</b> identified a peer to support behavior change. <b>Delivered</b> by staff training in public health and behavior change. | 10 weekly counseling calls and 10 corresponding behavioral podcasts                                                   |
| Gross et al. 2018 [30]  | RCT<br>I: Integrated NIP and Enhanced Women, Infant and Children Special Supplemental Nutrition Program<br>C: Usual care | Johns Hopkins Women Infants and Children's Program (WIC) from the Johns Hopkins Hospital Outpatient Center's Nutrition in Pregnancy Clinic (NIP), Maryland | N=53 (I: 23 vs. C: 30) pregnant low-income women; mean age: 26.1±4.4; mean pre-pregnancy BMI: 39.9±7.6                                                   | Postpartum | 53  | 96% | <b>Postpartum Weight Retention:</b> enhanced nutrition service on weight regulation, exercise, and behavior change strategies using brief videos, and print materials; <b>Delivered</b> by a registered dietitian.                                                                                                               | 5 healthy eating classes, 1 telephone counseling, 2 text messages/wk up to 6 months postpartum                        |

|                               |                                                                                                           |                                              |                                                                                                                                                                            |                          |     |      |                                                                                                                                                                                                                                                                                                                                                                               |                                                                                                                                           |
|-------------------------------|-----------------------------------------------------------------------------------------------------------|----------------------------------------------|----------------------------------------------------------------------------------------------------------------------------------------------------------------------------|--------------------------|-----|------|-------------------------------------------------------------------------------------------------------------------------------------------------------------------------------------------------------------------------------------------------------------------------------------------------------------------------------------------------------------------------------|-------------------------------------------------------------------------------------------------------------------------------------------|
| Liu et al 2021[43]            | RCT<br>I: Behavioral lifestyle intervention<br>C: Standard care                                           | South Carolina                               | N=228 (I: 114 vs. C: 114) pregnant women ( $\leq 16$ wks), overweight and obesity; pre-pregnancy BMI: $32.3 \pm 5.9$ (51.6% obese pre-pregnancy); mean age: $29.7 \pm 5.0$ | Pregnancy and postpartum | 228 | 44%  | <b>Weight Management:</b> self-monitoring weight (scale), physical activity (Sense Wear Armband), dietary practices. <b>Social support:</b> all participants join a Facebook. <b>Delivered</b> by interventionists.                                                                                                                                                           | 1 in-depth counseling at $\leq 18$ weeks of gestation<br>10 weekly individual phone calls followed by weekly or biweekly counseling calls |
| El-Mohandes et al., 2008 [29] | RCT I:<br>Reduction of psychosocial risks in postpartum (smoking, ETSE, depression, IPV)<br>C: Usual care | Washington, DC                               | N=913 (I: 452 vs. C: 461) pregnant women, mean age: $24 \pm 0.3$                                                                                                           | Pregnancy and postpartum | 913 | 100% | <b>Reduction of Psychosocial Risks:</b> prenatal clinic-based individualized counseling based on the transtheoretical stage of risky health behaviors; <b>Delivered</b> by social work and mental health professionals.                                                                                                                                                       | Pregnancy: 45 min/sessions x 4-8 sessions;<br>Postpartum: 45 min/sessions x up to 2 sessions                                              |
| Grote et al 2009 [32]         | RCT<br>I: Enhanced interpersonal psychotherapy (IPT-B)<br>C: Enhanced usual care                          | Women's Hospital in Pittsburgh, Pennsylvania | N=53 (I: 25 vs. C: 28); gestational week: $22.6 \pm 6.7$ ; low-income ; Edinburgh Postnatal Depression Scale ( $>12$ ); mean age: $24.3 \pm 5.3$                           | Pregnancy                | 53  | 62%  | <b>Depression Psychotherapy (IPT-B):</b> a multicomponent model of care, including an engagement session, acute IPT-B resolving interpersonal problem areas (role transition, role dispute, grief, and interpersonal deficits), and maintenance IPT; <b>Delivered</b> by doctoral (psychologist) and master students (social work). If needed, phone sessions were available. | Weekly IPT-B session/ x 8 weeks<br>Maintain phase: biweekly or monthly up to six months postpartum                                        |

|                               |                                                                                                                                   |                                                              |                                                                                                                                                                                                                                                                                                        |                          |     |     |                                                                                                                                                                                                                                                                                                              |                                                                                          |
|-------------------------------|-----------------------------------------------------------------------------------------------------------------------------------|--------------------------------------------------------------|--------------------------------------------------------------------------------------------------------------------------------------------------------------------------------------------------------------------------------------------------------------------------------------------------------|--------------------------|-----|-----|--------------------------------------------------------------------------------------------------------------------------------------------------------------------------------------------------------------------------------------------------------------------------------------------------------------|------------------------------------------------------------------------------------------|
| Cinciripini et al., 2020 [27] | RCT<br>I: Cognitive behavioral analysis system of psychotherapy (CBASP)<br>C: Matched control focused on health and wellness (HW) | University of Texas M. D. Anderson Cancer Center             | N= 157 (I: 128 vs.C: 129) pregnant women, mostly low-income; mean age: 25±5.9                                                                                                                                                                                                                          | Pregnancy                | 157 | 54% | <b>Depression-focused Intervention for Smoking Cessation (CBASP):</b> in-person counseling based on cognitive behavioral analysis system of psychotherapy; <b>Delivered</b> by Ph.D. therapists.                                                                                                             | 60 min/session x 10 sessions                                                             |
| Kranzler et al.2021 [38]      | RCT<br>I: Bupropion<br>C: Placebo                                                                                                 | Philadelphia, PA                                             | N = 129 (I: 64 vs. C:65), low-income, pregnant mothers (13-26 weeks of gestation), current smokers; mean age: 28.5 ± 4.8                                                                                                                                                                               | Pregnancy and postpartum | 129 | 52% | <b>Medication Intervention:</b> bupropion given with smoking cessation counseling sessions; <b>Delivered</b> by staff via text messaging system.                                                                                                                                                             | 10 weeks of given medication<br>6 counseling sessions: 4 during pregnancy & 2 postpartum |
| McKee et al 2006 [44]         | RCT<br>Three arms (depression intervention vs. treatment as usual vs. non-depressed group)                                        | Community health centers in the south Bronx of New York City | N= 187 (I: 100 vs. C87) low-income minority Black and Hispanic pregnant women recruited from community health centers, 100 with elevated depression (53 intervention vs. 47 TAU) and 87 non-depressed comparison group. Mean age: 24.7± 5.5; gestational age at enrollment: 28.4 ± 2.5; 19.3% married. | Pregnancy and postpartum | 187 | 43% | <b>Depression Intervention:</b><br>1) CBT developed for patients in primary care (e.g., cognitive distortion and reframing, relaxation technique, 44 setting) 2) child-development (CD) psychoeducation modules and 3) social support building (SSB) activities; <b>Delivered</b> in person or by telephone. | 8 CBT and education sessions                                                             |
| Chao et al. 2017 [26]         | RCT<br>I: Telephone counseling & mhealth weighing<br>C: Treatment as usual                                                        | Obstetrics clinics in Philadelphia                           | N=41 (I: 20 vs.C:21) pregnant mothers, mean age: 28.7±5.8 years; mean pre-pregnancy BMI: 31.2 ± 6.2 kg/m2                                                                                                                                                                                              | Pregnancy                | 41  | 54% | <b>Weight Management:</b> telephone counseling on behaviors related to weight loss and mhealth weighing; <b>Delivered</b> by a dietitian.                                                                                                                                                                    | 20-min telephone counseling/wk between 16-36 weeks of pregnancy                          |

|                                    |                                                                                |                                                                                            |                                                                                                                                                                           |                          |     |      |                                                                                                                                                                                                                                                                                                                                                                             |                                                                                                  |
|------------------------------------|--------------------------------------------------------------------------------|--------------------------------------------------------------------------------------------|---------------------------------------------------------------------------------------------------------------------------------------------------------------------------|--------------------------|-----|------|-----------------------------------------------------------------------------------------------------------------------------------------------------------------------------------------------------------------------------------------------------------------------------------------------------------------------------------------------------------------------------|--------------------------------------------------------------------------------------------------|
| South et al.<br>2021<br>[47]       | RCT<br>I: Natured Connect & Education C: Attention control (Education session) | Philadelphia, PA                                                                           | N= 36 (I: 17 vs. C: 19) postpartum women from lower-resourced, minority neighborhoods; mean age: 28±6; mean BMI: 32.5 ± 4.3                                               | Postpartum               | 39  | 90%  | <b>Nature Connect:</b> spending time in nature with a nature coach who performed a home visit on day 1, a park visit on day 8, and a phone call check-in on day 15; personalized reminders and feedback were received through texts; <b>Delivered</b> by a nature coach of community health experience                                                                      | 1 hr/wk x 4 weeks                                                                                |
| Jesse et al<br>2015<br>[36]        | RCT<br>I: Insight-Plus+Cognitive Behavioral Intervention C: Usual care         | Local health department and regional perinatal center, East Carolina                       | N=146 (I: 72 vs. C: 74) rural, minority, low-income pregnant women with Edinburgh Postnatal Depression Scale score > 4; mean age: 25.05±5.49                              | Pregnancy                | 146 | 68%  | <b>Depression Intervention (Insight-Plus+Cognitive Behavioral Intervention):</b> psychoeducation of perinatal depression, coping, relaxing, domestic violence, grief loss, spirituality; MP3 player for stress reduction; <b>Delivered</b> by a clinical social worker, other licensed mental health professionals, and a “resource mom” (a paraprofessional staff member). | 6 group sessions: 2 hrs/group per week with weekly booster sessions over telephone.              |
| Haire-Joshu et al.<br>2019<br>[33] | RCT I: Parents as Teachers (PAT) + Lifestyle C: Usual care (PAT)               | Barnes-Jewish Hospital and Washington University School of Medicine in St. Louis, Missouri | N=185 (I: 92 vs. C: 93) socioeconomic disadvantaged background; obese and overweight at pregnancy onset; Intervention mean age: 24.7 ± 5.3 vs. Control mean age: 24.7±5.6 | Pregnancy and postpartum | 185 | 100% | <b>Weight Management:</b> reinforced eating and activity behaviors learned prenatally while also addressing challenges faced by the new parent (e.g., infant feeding, sleep deprivation); <b>Delivered</b> by parent educators.                                                                                                                                             | Pregnancy: bi-weekly home visit<br><br>Postpartum: monthly home visit until 12 months postpartum |

|                          |                                                                                          |                                                             |                                                                                                                                                                                                                                                                                      |                                    |       |     |                                                                                                                                                                                                                                                                                                                                                                                                                                                                                    |                                                                                                                                                                      |
|--------------------------|------------------------------------------------------------------------------------------|-------------------------------------------------------------|--------------------------------------------------------------------------------------------------------------------------------------------------------------------------------------------------------------------------------------------------------------------------------------|------------------------------------|-------|-----|------------------------------------------------------------------------------------------------------------------------------------------------------------------------------------------------------------------------------------------------------------------------------------------------------------------------------------------------------------------------------------------------------------------------------------------------------------------------------------|----------------------------------------------------------------------------------------------------------------------------------------------------------------------|
| Hans et al., 2018 [34]   | RCT I:<br>Doula-home-visitation program<br>C: Case Management<br>Control                 | High-poverty Illinois communities                           | N=312 (I:156 vs.C:156); pregnant women, Intervention mean age: 18.5 ± 2.0 vs. Control mean age 18.3± 1.6                                                                                                                                                                             | Pregnancy and postpartum           | 312   | 45% | <b>Doula combined Home Visitation:</b> doula provided perinatal health education (e.g., prenatal classes; pregnancy health, childbirth preparation, breastfeeding, newborn care, postpartum health), occasionally attended medical visits, attended hospital births; home visitors focused on building mother-infant relationship, child development, child safety, and educational-work planning, screening for family basic needs; <b>Delivered</b> by doulas and home visitors. | Pregnancy-1 <sup>st</sup> week<br>postpartum: weekly home visit primarily by doula<br><br>6 weeks – 3 months<br>Postpartum: weekly session primarily by home visitor |
| Kitzman et al. 1997 [37] | RCT I<br>(T3 & T4):<br>Family Nurse Home Visitation<br>C (T1 & T2):<br>Attention control | Obstetrical clinic at the Reginal Medical Center in Memphis | N= 1,139 (I: 458 vs. C: 681) primarily African-American women at less than 29 weeks' gestation, with no previous live births, and with at least 2 sociodemographic risk characteristics (unmarried, <12 years of education, unemployed). Mean age: 18 years (SDs reported for T1-T4) | Pregnancy and 24 months postpartum | 1,139 | 90% | <b>Family Nurse Home Visitation:</b> health education about signs/symptoms of pregnancy complications, parenting, child development; provide social support and assistance with life-course development (pregnancy planning, educational achievement, employment); <b>Delivered</b> by nurse.                                                                                                                                                                                      | Pregnancy: ~7 home visits<br><br>Birth - 24 months<br>postpartum: ~26 home visits                                                                                    |



|                          |                                                 |                                                                                                      |                                                                                                                            |                          |     |     |                                                                                                                                                                                                                                                                                                                                                                           |                                                                                                                                                                                 |
|--------------------------|-------------------------------------------------|------------------------------------------------------------------------------------------------------|----------------------------------------------------------------------------------------------------------------------------|--------------------------|-----|-----|---------------------------------------------------------------------------------------------------------------------------------------------------------------------------------------------------------------------------------------------------------------------------------------------------------------------------------------------------------------------------|---------------------------------------------------------------------------------------------------------------------------------------------------------------------------------|
| Herring et al. 2014 [35] | RCT pilot<br>I: Healthy4Baby<br>C: Usual care   | Two large outpatient practices which served primarily Medicaid-insured patients in Philadelphia, PA. | N = 18 (I: 9 vs. C: 9) low-income (all on Medicaid), obese urban postpartum mothers; mean age: 24.2 ± 5.1, BMI: 36.9 ± 6.1 | Postpartum               | 18  | 78% | <b>Weight Management (Healthy4Baby):</b> limit sugary drinks, junk, and high-fat foods with a caloric goal; increase physical activity (pedometer) and hours of sleep, self-weighing (digital scale) goal tracking. <b>Social support:</b> all participants joined the Facebook <b>Delivered</b> via text messaging and Facebook.                                         | 15min/tele-health coaching biweekly x 14 weeks<br><br>self-monitoring texts 3 to 4 times weekly                                                                                 |
| Lane et al 2023 [40]     | RCT<br>I: Lifestyle counseling<br>C: Usual care | Southeastern US                                                                                      | N=219 (I: 112 vs. C: 107) pregnant and postpartum women with pre-pregnancy overweight or obesity; mean age: 29.7± 0.3      | Pregnancy and postpartum | 219 | 44% | <b>Weight Management:</b> Lifestyle counseling involving dietary and physical activity counseling related to gestational weight gain and postpartum weight retention through educational handouts, podcasts, self-monitoring (pedometers, scales); <b>Social Support:</b> all participants joined a private Facebook group. <b>Delivered</b> by trained interventionists. | In-depth counseling before week 18 of pregnancy and early postpartum respectively;<br><br>Weekly or biweekly telephone counseling after the 1 <sup>st</sup> in-depth counseling |

|                            |                                                                                 |                                                         |                                                                                                                                                  |                          |     |      |                                                                                                                                                                                                                                                                             |                                                                          |
|----------------------------|---------------------------------------------------------------------------------|---------------------------------------------------------|--------------------------------------------------------------------------------------------------------------------------------------------------|--------------------------|-----|------|-----------------------------------------------------------------------------------------------------------------------------------------------------------------------------------------------------------------------------------------------------------------------------|--------------------------------------------------------------------------|
| Napolitano et al 2021 [45] | RCT I: BeFAB virtual coaching<br>C: Usual care                                  | Washington, DC                                          | N = 136 (I: 65 vs. C: 71); postpartum mothers, mean age: $27.8 \pm 5.4$ ; mean BMI = $32.5 \pm 4.3$                                              | Postpartum               | 136 | 100% | <b>Digital Lifestyle Health Coaching:</b> virtual coaching on meal preparation, managing cravings, physical activity tips, and goal setting. <b>Social Support:</b> all participants join the Facebook. <b>Delivered</b> using a private Facebook group and an app (BeFAB). | 5 days/wk x 12 weeks                                                     |
| Lewey et al., 2022 [41]    | RCT I: Text-Based Gamification Intervention<br>C: Attention control             | Penn Medicine hospitals, Philadelphia, PA.              | N= 127 (I: 64 vs. C: 63) postpartum mothers, 52% on Medicaid insurance, 30% taking BP medications, mean age $32 \pm 5.6$ ; mean BMI $32 \pm 7.5$ | Postpartum               | 127 | 55%  | <b>Physical Activity:</b> Use of gamification; points and acquired levels for daily step goal achievement. <b>Social support:</b> team-based gamification. <b>Delivered</b> digitally using a wearable device and receiving text messages                                   | 12 weeks                                                                 |
| Pezley et al., 2022 [46]   | Randomized pilot Two active treatments I1: Sunnyside vs. I2: Sunnyside Plus     | Participants from a national pregnancy digital platform | N=22 (I1=9 vs. I2:13) pregnant mothers with 64% having obesity; mean age $30.4 \pm 3.9$                                                          | Pregnancy & Postpartum   | 22  | 100% | <b>CBT intervention:</b> Web-based education and text messages targeting skills to manage mood and breastfeeding education for 6 weeks during pregnancy and up to 6 weeks postpartum. <b>Delivered</b> by lactation specialists                                             | Pregnancy: 40-60 min/wk x 6 weeks;<br>Postpartum: 10-20 min/wk x 6 weeks |
| Bryant et al. 2023 [52]    | Quasi-experimental (pre-post) without control group I: Joyuus, a mobile program | Participants were from 27 states in the U.S.            | N=87 pregnant mothers; mean age: 30 years (SD not reported)                                                                                      | Pregnancy and postpartum | 87  | 99%  | <b>Self-Care App (Joyuus):</b> health education through a self-care app to address psychosocial issues. <b>Delivered</b> digitally.                                                                                                                                         | Used Joyuus for one month                                                |

|                           |                                                                                                         |                                                                       |                                                                                                                                                                                                |                |     |      |                                                                                                                                                                                                                                                       |                                                                                                                    |
|---------------------------|---------------------------------------------------------------------------------------------------------|-----------------------------------------------------------------------|------------------------------------------------------------------------------------------------------------------------------------------------------------------------------------------------|----------------|-----|------|-------------------------------------------------------------------------------------------------------------------------------------------------------------------------------------------------------------------------------------------------------|--------------------------------------------------------------------------------------------------------------------|
| Cavallo et al. 2016 [55]  | Quasi-experimental (pre-post) without control group<br>I: Web-based weight loss intervention            | Family planning clinic located at a health department, North Carolina | N=40 low-income women of childbearing age; mean age: $30 \pm 6.5$ ; mean BMI ( $\text{kg}/\text{m}^2$ ): $39 \pm 8.5$ ; 83% with obesity, 25% with HTN, 10% with DM, 10% with high cholesterol | Pre-conception | 40  | 73%  | <b>Weight Management:</b> group-based face-to-face education and web-based modalities focusing on physical activity, and nutrition; <b>Delivered</b> digitally.n                                                                                      | 70-120 min/wk x 20 weeks                                                                                           |
| Kannan, 2010 [53]         | Pilot study with pre-and post-test without control group<br>I: Healthy Eating and Harambee intervention | Urban community centers in Genessee Country, Michigan.                | N=102 healthy, low income, non-pregnant African-American women; mean age = 27.5 ( SD not reported)                                                                                             | Pre-conception | 102 | 100% | <b>Lifestyle Intervention (Healthy Eating and Harambee):</b> Healthy eating habits, nutrition, meal preparation, biomedical self-monitoring (Omron BP cuff), body image; <b>Delivered</b> by peers.                                                   | 1 session per wk/ x 13 weeks                                                                                       |
| Krukowski et al 2021 [39] | RCT: 2x2x2 factorial design including 8 groups                                                          | Obstetric clinic, Memphis, Tennessee                                  | N=40 pregnant women in their first trimester, 56% with overweight/obesity; mean age: $29.1 \pm 12.5$                                                                                           | Pregnancy      | 40  | 62%  | <b>Incentive Intervention:</b> incentives for self-weighing on a digital scale, incentives for following the GWG guidelines, incentives for meeting physical activity goals; <b>Delivered</b> digitally using emails, text messages, wireless scales, | Participants' daily self-weighing behavior and weekly physical activity (measured in active minutes)/ for 6 months |
